# Supplementary material
Source: PubMed Central journal article supplement (PMC3740877)
Supplement: 1300910110_pnas.201300910SI.pdf [file 1300910110_pnas.201300910SI.pdf]

# Supporting Information

Gerasimenko et al. 10.1073/pnas.1300910110

## SI Materials and Methods

Reagents used in this study include Fluo-4/Fura-2 (Invitrogen), thapsigargin (Calbiochem), collagenase (Worthington), palmitoleic acid ethyl ester (POAEE) (Cayman Chemical), and GSK-7975A from GSK (2,6-difluoro-*N*-(1-(4-hydroxy-2-(trifluoromethyl)benzyl)-1*H*-pyrazol-3-yl)benzamide), compound 36 from patent WO2010/122089 A1 (1). All other chemicals were purchased from Sigma. Pancreatic acinar cells were isolated from mice as described previously (2). The extracellular solution contained: 140 mM NaCl, 4.7 mM KCl, 10 mM Hepes (KOH), 1 mM MgCl<sub>2</sub>, 10 mM glucose, pH 7.2, and CaCl<sub>2</sub> (0–10 mM as described in the text). Changes in the cytoplasmic Ca<sup>2+</sup> concentration ([Ca<sup>2+</sup>]<sub>i</sub>) were monitored by Fluo-4 or Fura-2 fluorescence measurements and necrosis assessed by propidium iodide (PI) uptake (3). We assessed protease activation with the generic fluorescent substrate bis-L-aspartic acid amide rhodamine 110 (D2-R110) and trypsinogen activation with the trypsin fluorescent substrate Rhodamine 110, bis-(CBZ-L-isoleucyl-L-prolyl-L-arginine amide), dihydrochloride (BZiPAR) (4, 5). Fluorescence signals were plotted as F/F<sub>0</sub> (F<sub>0</sub> is the initial level of fluorescence). The polynomial curve fit method was used to estimate IC<sub>50</sub>. Statistical significance and *P* values were calculated using *t* test or one-way ANOVA. Data presented as mean ± SEM. In Na<sup>+</sup>-free solution, Na<sup>+</sup> was replaced by N-methyl-D-glucamine (NMDG<sup>+</sup>). During standard patch clamp whole-cell recordings, the pipette solution contained 120 mM KCl, 1 mM MgCl<sub>2</sub>, 2 mM MgATP, 15 mM Hepes, 10 mM BAPTA and 2 mM CaCl<sub>2</sub>. Patch pipettes were pulled from bo-

rosilicate glass capillaries (Harvard Apparatus). The pipettes had a resistance of 3–5 megaohms when filled with an intracellular solution (containing 120 mM KCl). Whole cell currents were sampled at 10 KHz using an EPS-8 amplifier and Pulse software (HEKA) or MultiClamp700B amplifier and pClamp 10 software (Molecular Devices). In the standard protocol the membrane voltage was clamped at –50 mV. For investigations of current-voltage relationships voltage ramps were applied from –100 to +40 mV (the slope was 400 mV/s). Changes in [Ca<sup>2+</sup>]<sub>i</sub> in the intracellular stores were assessed by fluorescence measurements in cells loaded with Fluo-5N AM (Invitrogen) simultaneously with measurements of whole cell currents.

The protocol for primary hepatocyte isolation was as described in ref. 6. All animal work was carried out in accordance with the UK Animals (Scientific Procedures) Act (1986) and approved by the Ethical Review Committee of Cardiff University. Briefly, the liver was perfused with buffer I without Ca<sup>2+</sup>: 140 mM NaCl; 4.7 mM KCl; 10 mM Hepes; 10 mM D-glucose; 100 μM EGTA; (pH 7.4); the rate of perfusion was 5 mL/min at 37 °C. Then the liver was perfused with buffer I in the presence of 1.3 mM CaCl<sub>2</sub> and collagenase I (Sigma) for 10 min at 37 °C. Dissociated hepatocytes were centrifuged at 50 × *g* for 1 min and transferred into buffer I containing 1 mM MgCl<sub>2</sub> and 1.3 mM CaCl<sub>2</sub>, pH 7.4.

AR42J cells (ECACC, 93100618) were maintained in RPMI 1640 as described previously (3, 7).

For intracellular calcium imaging isolated hepatocytes were loaded with fluo-4 in AM form at room temperature for 45 min.

1. Derler I, et al. (2013) The action of selective CRAC channel blockers is affected by the Orai pore geometry. *Cell Calcium* 53(2):139–151.
2. Gerasimenko JV, et al. (2002) Menadione-induced apoptosis: Roles of cytosolic Ca<sup>2+</sup> elevations and the mitochondrial permeability transition pore. *J Cell Sci* 115(Pt 3): 485–497.
3. Ferdek PE, et al. (2012) A novel role for Bcl-2 in regulation of cellular calcium extrusion. *Curr Biol* 22(13):1241–1246.
4. Raraty M, et al. (2000) Calcium-dependent enzyme activation and vacuole formation in the apical granular region of pancreatic acinar cells. *Proc Natl Acad Sci USA* 97(24):13126–13131.

5. Gerasimenko JV, et al. (2009) Pancreatic protease activation by alcohol metabolite depends on Ca<sup>2+</sup> release via acid store IP<sub>3</sub> receptors. *Proc Natl Acad Sci USA* 106(26): 10758–10763.
6. Li W-C, Ralphs KL, Tosh D (2010) Isolation and culture of adult mouse hepatocytes. *Methods Mol Biol* 633:185–196.
7. Gallacher DV, et al. (1990) Substance P and bombesin elevate cytosolic Ca<sup>2+</sup> by different molecular mechanisms in a rat pancreatic acinar cell line. *J Physiol* 426:193–207.

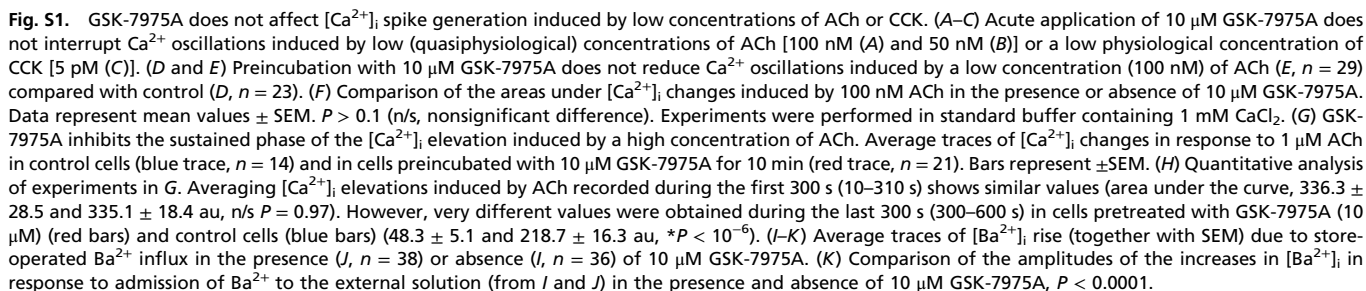

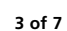

**Fig. S2.** Blocker of CRAC channels 2-APB induces rise in  $[Ca^{2+}]_i$  and necrosis in pancreatic acinar cells, which cannot be inhibited by GSK-7975A. (A) Averaged traces (together with error bars) of rise in  $[Ca^{2+}]_i$  induced by 100  $\mu$ M 2-APB ( $n = 14$ ). (B) Preincubation of pancreatic acinar cells with 100  $\mu$ M 2-APB induces substantial necrosis ( $35 \pm 2\%$ ,  $P < 0.0015$ ,  $n = 4$  series, with  $>80$  cells in each). GSK-7975A does not induce significant necrosis by itself compared with control ( $P > 0.2$ ) and does not protect against the necrosis induced by 2-APB ( $P > 0.8$ ).

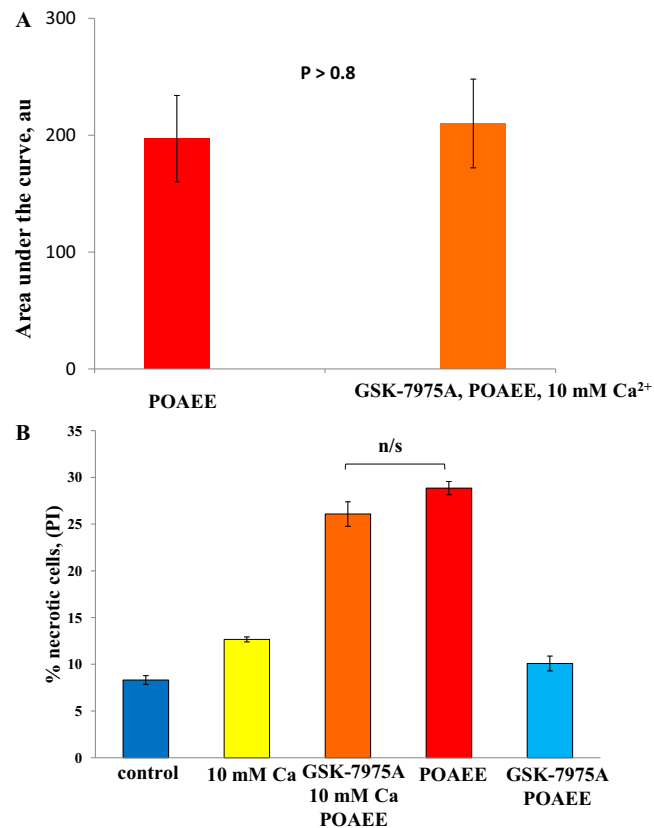

**Fig. 53.** Elevating the external  $\text{Ca}^{2+}$  concentration from 1 mM to 10 mM counteracts the protective effect of GSK-7975A against the POAEE-induced  $[\text{Ca}^{2+}]_i$  rise and necrosis. (A) Comparison of the "areas under the curve" of the POAEE (100  $\mu\text{M}$ )-induced  $[\text{Ca}^{2+}]_i$  responses with the normal 1 mM external  $[\text{Ca}^{2+}]$  ( $n = 11$ , typical example shown in Fig. 4A) and the responses induced by 100  $\mu\text{M}$  POAEE in the presence of 10 mM external  $\text{Ca}^{2+}$  and GSK-7975A (10  $\mu\text{M}$ ) (cells pretreated with GSK-7975A for 10 min,  $n = 26$ ). No significant difference was found ( $P > 0.8$ ). (B) POAEE (100  $\mu\text{M}$ )-induced necrosis ( $28.9 \pm 0.7\%$  necrotic cells) was dramatically reduced in cells treated with 10  $\mu\text{M}$  GSK-7975A for 10 min ( $10.1 \pm 0.8\%$ ,  $P < 0.003$ , compared with POAEE treatment alone). However, if after treatment with GSK-7975A (10  $\mu\text{M}$ , 10 min) POAEE (100  $\mu\text{M}$ ) was applied in the presence of 10 mM  $\text{CaCl}_2$  in the external medium, the level of necrosis was not significantly different ( $P > 0.14$ ) from POAEE-induced necrosis at an external  $\text{Ca}^{2+}$  concentration of 1 mM and without GSK-7975A ( $26 \pm 1.3\%$ ). In a control series of experiments (no POAEE treatment, 1 mM  $\text{CaCl}_2$ ), the level of necrosis was  $8.3 \pm 0.5\%$ . The level of necrosis in the presence of 10 mM  $\text{CaCl}_2$  increased to  $12.7 \pm 0.3\%$  ( $P < 0.0001$ , compared with control).  $n = 3$  for all series of experiments with number of tested cells in each group  $> 350$ .

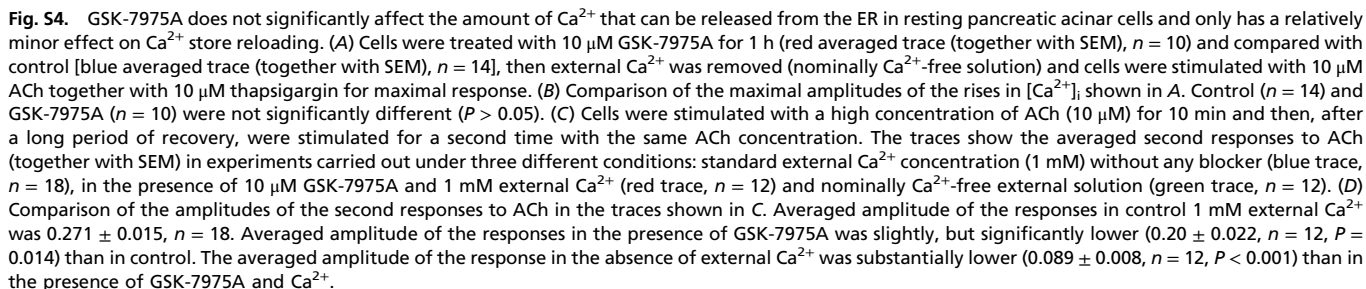



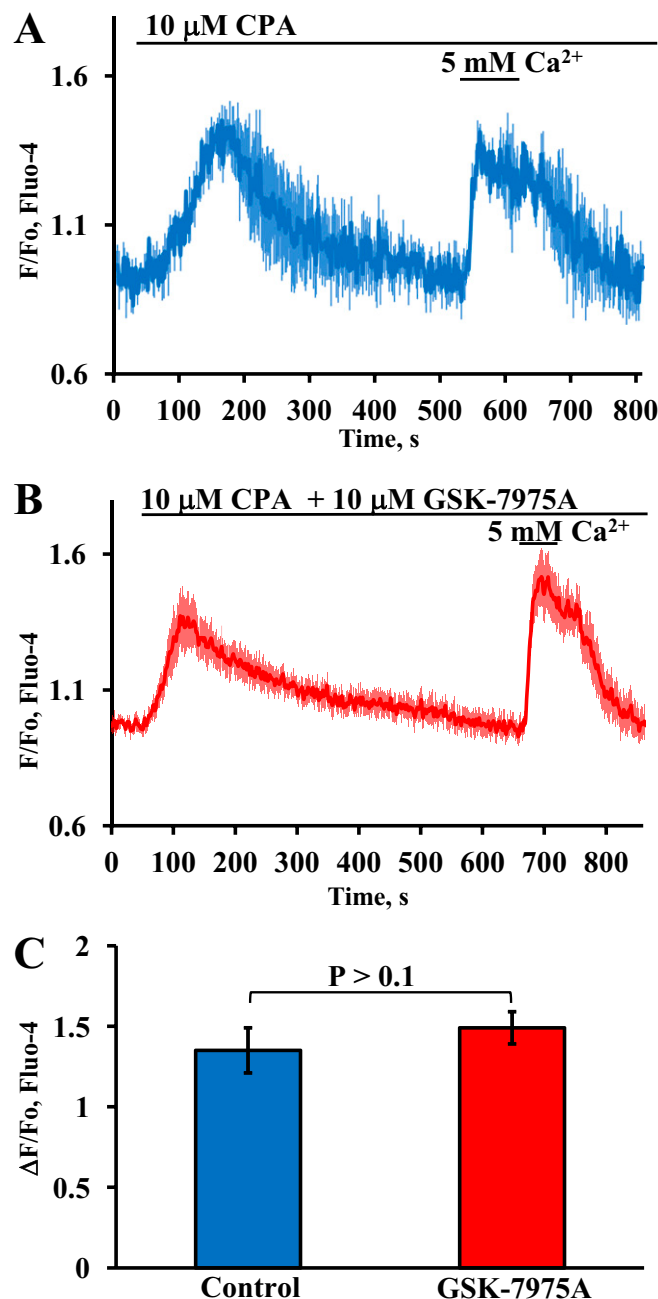

**Fig. S6.** GSK-7975A does not affect store-operated  $\text{Ca}^{2+}$  entry in rat pancreatic tumor cell line (AR42J). (A) Control averaged traces (together with error bars) of changes in  $[\text{Ca}^{2+}]_i$  induced in AR42J cells first by exposure to 10  $\mu\text{M}$  cyclopiazonic acid (CPA) in the absence of external  $\text{Ca}^{2+}$  and thereafter by introducing an external solution containing 5 mM  $\text{Ca}^{2+}$  ( $n = 3$ ). (B) Same protocol as in A, but this time in the presence of 10  $\mu\text{M}$  GSK-7975A ( $n = 7$ ). The rise in  $[\text{Ca}^{2+}]_i$  following admission of the external solution containing 5 mM  $\text{Ca}^{2+}$  is very similar to that observed in the absence of GSK-7975A. (C) Comparison of the amplitudes of the rise in  $[\text{Ca}^{2+}]_i$  induced by store-operated  $\text{Ca}^{2+}$  entry in control (A) and in the presence of 10  $\mu\text{M}$  GSK-7975A (B). There is no significant difference ( $P > 0.1$ ).
